# Supplementary material for: Skeletal Muscle Area Is an Independent Predictor for Mortality in Elderly Patients With ANCA Associated Vasculitis
Source: Research Square preprint supplement (doi:10.21203/rs.3.rs-132881/v1), 2021-01-04
Supplement: Supplementary file 2 [file 8f5fbbfa64cc6cf939efc7f5.docx]

**Skeletal muscle area is an independent predictor for mortality in elderly patients with ANCA associated vasculitis**

Xixi Zhenga M.D., Peng Xiaa M.D., Jiaying Lia M.S., Gu-Mu-Yang Zhangb M.D., Yan Qina M.D., Xuemei Lia M.D., Hao Sunb M.D., Limeng Chena M.D.

**Affiliations**

a Nephrology Division, Peking Union Medical College Hospital, Chinese Academy of Medical Sciences, Beijing, China, 100730

b Radiology Department, Peking Union Medical College Hospital, Chinese Academy of Medical Sciences, Beijing, China, 100730

**Corresponding Authors**

Limeng Chen and Hao Sun

Peking Union Medical College Hospital, Chinese Academy of Medical Sciences

No.1 Shuaifuyuan Wangfujing Dongcheng District,

Beijing, 100730, China

Tel: 69155055

E-Mail: chenlimeng@pumch.cn

**Supplementary Material**

**Supplement Table 1 Analysis of Muscle Area and Clinical Parameters**

| **Clinical parameters** |  |  | **P value** |
| --- | --- | --- | --- |
| **Binary Variables, muscle area in cm2** | | | |
| Gender | Male: 114.16 ±23.63 | Female: 92.34 ±20.40 | <0.0001*** |
| Diabetes | Diabetes 94.33 ±19.18 | Non-diabetic: 105.39 ±25.49 | 0.142 |
| Pulmonary comorbidities | With: 106.15 ±27.60 | Without: 101.20 ±23.14 | 0.696 |
| Plasma exchange | Yes: 98.68 ±27.16 | No:104.10 ±23.53 | 0.465 |
| **Continuous Variables** | **Correlation coefficient** | | **P value** |
| Age | r = -0.40 | | 0.002** |
| BMI | r = 0.39 | | 0.003** |
| BVAS | r = 0.08 | | 0.544 |
| ANCA titer | Speraman’s Rho = -0.24 | | 0.06 |
| eGFR | Speraman’s Rho = -0.10 | | 0.48 |
| Hemoglobin | r = 0.16 | | 0.23 |
| Lymphocyte | Speraman’s Rho = 0.10 | | 0.47 |
| Albumin | r = 0.15 | | 0.27 |
| Immunoglobulin G | Speraman’s Rho = -0.04 | | 0.77 |
| hsCRP | Speraman’s Rho = -0.18 | | 0.20 |

Abbreviations: BMI body mass index, BVAS Birmingham Vasculitis Activity Score (version 3), ANCA Antineutrophil Cytoplasmic Antibodies, eGFR estimated glomerular filtration rate, hsCRP high sensitivity C-Reactive Protein

* P value <0.05

** P value<0.01

***P value <0.001


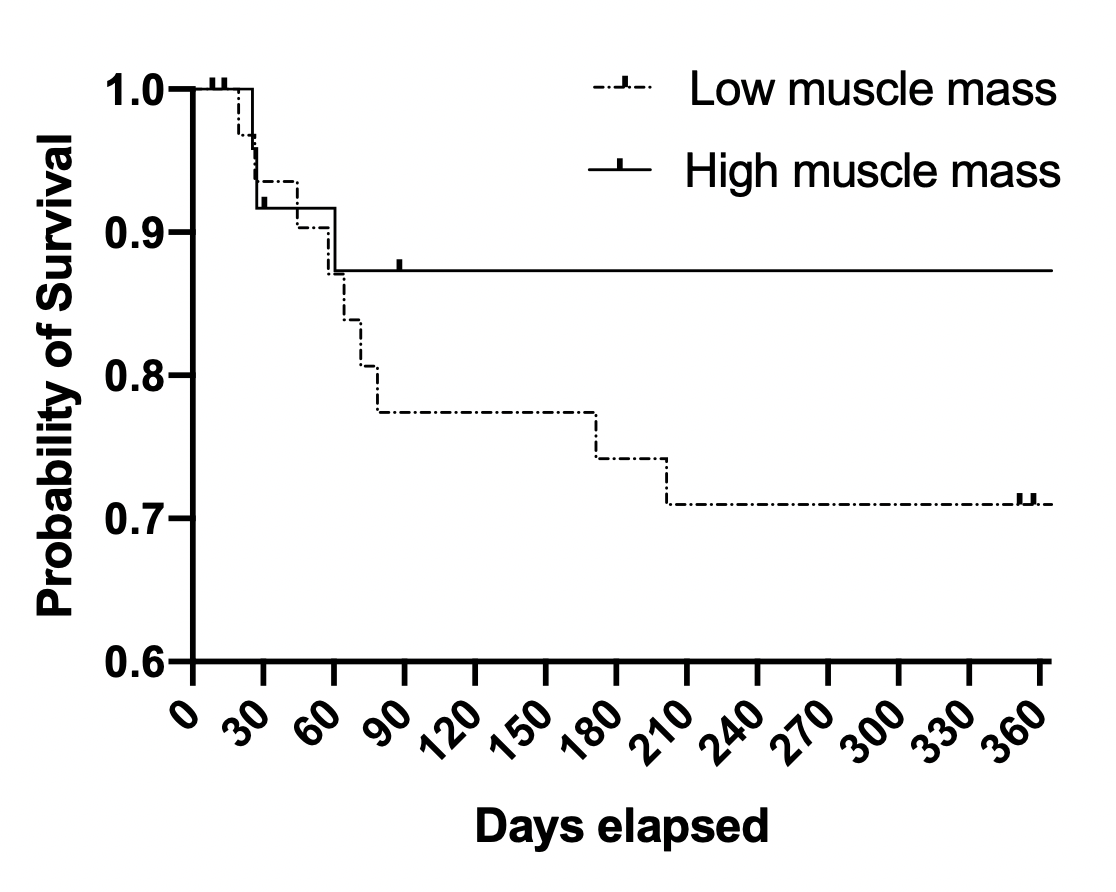


Supplement Fig. 1. Kaplan-Meier Curve of One year survival stratified by muscle mass
